# Supplementary material for: Genetic Markers Within Glutamate Receptors Associated With Antidepressant Treatment-Emergent Suicidal Ideation
Source: Atypon-hosted journal article supplement (doi:10.1176/appi.ajp.2008.08020274), 2008-07-01
Supplement: ajp_165_7_917_01.pdf [file ajp_165_7_917_01.pdf]

**Table 1**

**Demographic and Clinical Characteristics of Munich Antidepressant Response Signature Project Sample<sup>a</sup>**

| Characteristic                                | Group                                         |      |                                                      |      |                                                      |      | Analysis |    |       |
|-----------------------------------------------|-----------------------------------------------|------|------------------------------------------------------|------|------------------------------------------------------|------|----------|----|-------|
|                                               | Treatment-Emergent Suicidal Ideation Subjects |      | Non- Treatment-Emergent Suicidal Ideation Subjects—A |      | Non- Treatment-Emergent Suicidal Ideation Subjects—B |      | 2        | df | p     |
|                                               | N                                             | %    | N                                                    | %    | N                                                    | %    |          |    |       |
| Total sample                                  | 32                                            | 8.1  | 329                                                  | 82.6 | 79                                                   | 19.9 |          |    |       |
| Gender                                        |                                               |      |                                                      |      |                                                      |      | 0.312    | 2  | 0.856 |
| Male                                          |                                               | 43.8 |                                                      | 44.8 |                                                      | 49.5 |          |    |       |
| Female                                        |                                               | 56.3 |                                                      | 55.2 |                                                      | 50.5 |          |    |       |
| Employment status                             |                                               |      |                                                      |      |                                                      |      | 0.357    | 4  | 0.986 |
| Employed                                      | 32                                            | 62.9 | 329                                                  | 63.4 | 79                                                   | 61.1 |          |    |       |
| Retired                                       | 32                                            | 25.7 | 329                                                  | 24.1 | 79                                                   | 23.4 |          |    |       |
| Unemployed                                    | 32                                            | 11.4 | 329                                                  | 12.5 | 79                                                   | 15.5 |          |    |       |
| Living status                                 |                                               |      |                                                      |      |                                                      |      | 2.693    | 2  | 0.260 |
| Living with a partner, child, or other person | 32                                            | 54.3 | 329                                                  | 60.9 | 79                                                   | 64.5 |          |    |       |
| Single                                        | 32                                            | 45.7 | 329                                                  | 39.1 | 79                                                   | 35.5 |          |    |       |
| Bipolar features                              | 3                                             | 9    | 52                                                   | 15   | 11                                                   | 13   | 0.949    | 2  | 0.622 |
| Recurrent depression                          |                                               | 56.3 |                                                      | 58.2 |                                                      | 60.4 | 0.102    | 2  | 0.950 |
| Psychotic features                            |                                               | 18.8 |                                                      | 11.9 |                                                      | 13.9 | 1.253    | 2  | 0.534 |
| Family history of depression                  |                                               | 46.9 |                                                      | 46.6 |                                                      | 40.5 | 1.977    | 2  | 0.372 |
| History of attempted suicide                  |                                               | 17.9 |                                                      | 29.3 |                                                      | 20.0 | 4.846    | 2  | 0.089 |
| Medication                                    |                                               |      |                                                      |      |                                                      |      |          |    |       |
| SSRI                                          |                                               | 37.5 |                                                      | 37.8 |                                                      | 35.7 | 1.291    | 2  | 0.524 |
| Tricyclic antidepressant                      |                                               | 34.4 |                                                      | 20.4 |                                                      | 22.9 | 1.141    | 2  | 0.565 |
| SNRI                                          |                                               | 25   |                                                      | 19.4 |                                                      | 19.2 | 1.713    | 2  | 0.425 |

|                                     |      |      |      |      |      |      |                       |       |       |
|-------------------------------------|------|------|------|------|------|------|-----------------------|-------|-------|
| Mirtazapine                         |      | 28   |      | 35.7 |      | 34   | 0.776                 | 2     | 0.679 |
| NRI                                 |      | 12.5 |      | 2    |      | 4    | 2.472                 | 2     | 0.291 |
| Neuroleptic                         |      | 21.9 |      | 17.3 |      | 22   | 1.419                 | 2     | 0.492 |
| Mood stabilizer                     |      | 46.9 |      | 35.7 |      | 29.9 | 2.173                 | 2     | 0.337 |
| Benzodiazepine                      |      | 50   |      | 20.4 |      | 30   | <sup>b,c</sup> 16.094 | 2     | 0.001 |
|                                     | Mean | SD   | Mean | SD   | Mean | SD   | t                     | df    | p     |
| Age (years)                         | 47.1 | 16.1 | 49.3 | 14.1 | 50.8 | 14.3 | 1.273                 |       | 0.206 |
| Age at onset (years)                | 32.6 | 16.0 | 37.3 | 15.4 | 40.6 | 15.6 | 2.393 <sup>b</sup>    |       | 0.018 |
| HAM-D score at inclusion            | 24.5 | 7.1  | 26.6 | 6.6  | 22.8 | 6.5  | -0.759                |       | 0.45  |
| Previous episodes                   | 3.2  | 4.0  | 2.8  | 5.3  | 2.7  | 5.5  | -0.218                |       | 0.828 |
| Illness duration (years)            | 13.9 | 15.4 | 10.6 | 10.5 | 10.3 | 10.1 | -1.507                |       | 0.135 |
| Duration of current episode (weeks) | 38.0 | 58.4 | 39.1 | 69.3 | 28.4 | 21.7 | -0.672                |       | 0.503 |
| Single nucleotide polymorphism      | N    | %    | N    | %    | N    | %    | P                     | P     | OR    |
| GRIK2 gene                          |      |      |      |      |      |      |                       |       |       |
| rs2852618                           |      |      |      |      |      |      |                       |       |       |
| AA                                  | 3    | 9.4  | 86   | 26.3 | 27   | 34.6 | 0.045                 | 0.005 | 9.0   |
| AG                                  | 17   | 53.1 | 167  | 51.1 | 39   | 50.0 |                       |       |       |
| GG                                  | 12   | 37.5 | 74   | 22.6 | 12   | 15.4 |                       |       |       |
| rs954765                            |      |      |      |      |      |      |                       |       |       |
| AA                                  | 4    | 12.5 | 106  | 32.4 | 32   | 41.0 | 0.06                  | 0.007 | 7.3   |
| AG                                  | 18   | 56.2 | 157  | 47.7 | 35   | 44.9 |                       |       |       |
| GG                                  | 10   | 31.2 | 65   | 19.9 | 11   | 14.1 |                       |       |       |
| rs2782900                           |      |      |      |      |      |      |                       |       |       |
| CC                                  | 4    | 12.5 | 33   | 10.1 | 6    | 7.6  | 0.042                 | 0.007 | 4.3   |
| CT                                  | 21   | 65.6 | 149  | 45.6 | 30   | 38.0 |                       |       |       |
| TT                                  | 7    | 21.9 | 146  | 44.3 | 43   | 54.4 |                       |       |       |
| rs2518224 <sup>d</sup>              |      |      |      |      |      |      |                       |       |       |
| AA                                  | 26   | 81.2 | 265  | 80.5 | 60   | 75.9 | 1                     | 0.86  | 1.3   |
| AC                                  | 6    | 18.8 | 60   | 18.3 | 18   | 22.8 |                       |       |       |
| CC                                  | 0    | 0    | 4    | 1.2  | 1    | 1.3  |                       |       |       |
| GRIA3 gene                          |      |      |      |      |      |      |                       |       |       |

| rs4825476 |    |      |     |      |    |      |       |       |     |
|-----------|----|------|-----|------|----|------|-------|-------|-----|
| AA        | 25 | 78.1 | 191 | 57.9 | 45 | 57.0 | 0.018 | 0.041 | 2.7 |
| AG        | 6  | 18.8 | 88  | 26.8 | 24 | 30.4 |       |       |     |
| GG        | 1  | 3.1  | 50  | 15.2 | 10 | 12.7 |       |       |     |

<sup>a</sup>Thirty-two patients (8.1%) developed treatment-emergent suicidal ideation (comparable with 6.2% of patients reported in the STAR\*D study) and were compared with 329 patients (A) without worsening of suicidal thoughts and 79 participants (B) who were completely lacking suicidal ideation, a subgroup of A. Thirty-six patients were excluded from the analysis because their baseline suicidality was greater than zero, and they showed worsening of suicidal ideation and thus did not fit into any of the three groups. Antidepressant treatment is shown for the time frame of the onset of suicidal ideation in the treatment-emergent suicidal ideation group and the respective treatment weeks in the other two groups. Antidepressant monotherapy was administered to 62.5 % of the patients, while 37.5 % received combination therapy. Of patients with treatment-emergent suicidal ideation, 59.3% developed this side effect within the first 2 weeks after admission. Best empiric associations between genetic markers within GRIK2, GRIA3, and treatment-emergent suicidal ideation are shown. P-values are from allelic tests for treatment-emergent suicidal ideation-A versus non-treatment-emergent suicidal ideation-A and treatment-emergent suicidal ideation-B versus non-treatment-emergent suicidal ideation-B. Single nucleotide polymorphisms rs4825476 and rs2518224 were considered for replication of results from the STAR\*D study sample. All GRIK2 single nucleotide polymorphisms are in Hardy-Weinberg equilibrium ( $p > 0.7$ ), and GRIA3 is x-chromosomal. In female comparison subjects, Hardy-Weinberg equilibrium has a  $p$  value of 0.76. Odds ratios refer to allelic tests treatment-emergent suicidal ideation-B versus non-treatment-emergent suicidal ideation-B. Anecdotal evidence from the Munich Antidepressant Response Signature project trial showed that of the three patients who committed suicide under antidepressant treatment, one was homozygote for the risk alleles of both GRIK2 (rs2852618-G) and GRIA3 (rs4825476-A), and the other two patients were heterozygote for these two risk alleles.

<sup>b</sup>Treatment-emergent suicidal ideation-A versus non-treatment-emergent suicidal ideation-A ( $p > 0.05$ ).

<sup>c</sup>Treatment-emergent suicidal ideation-B versus non-treatment-emergent suicidal ideation-B ( $p > 0.05$ ).

<sup>d</sup>STAR\*D study risk allele=G.
